# Supplementary material
Source: PubMed Central journal article supplement (PMC3797193)

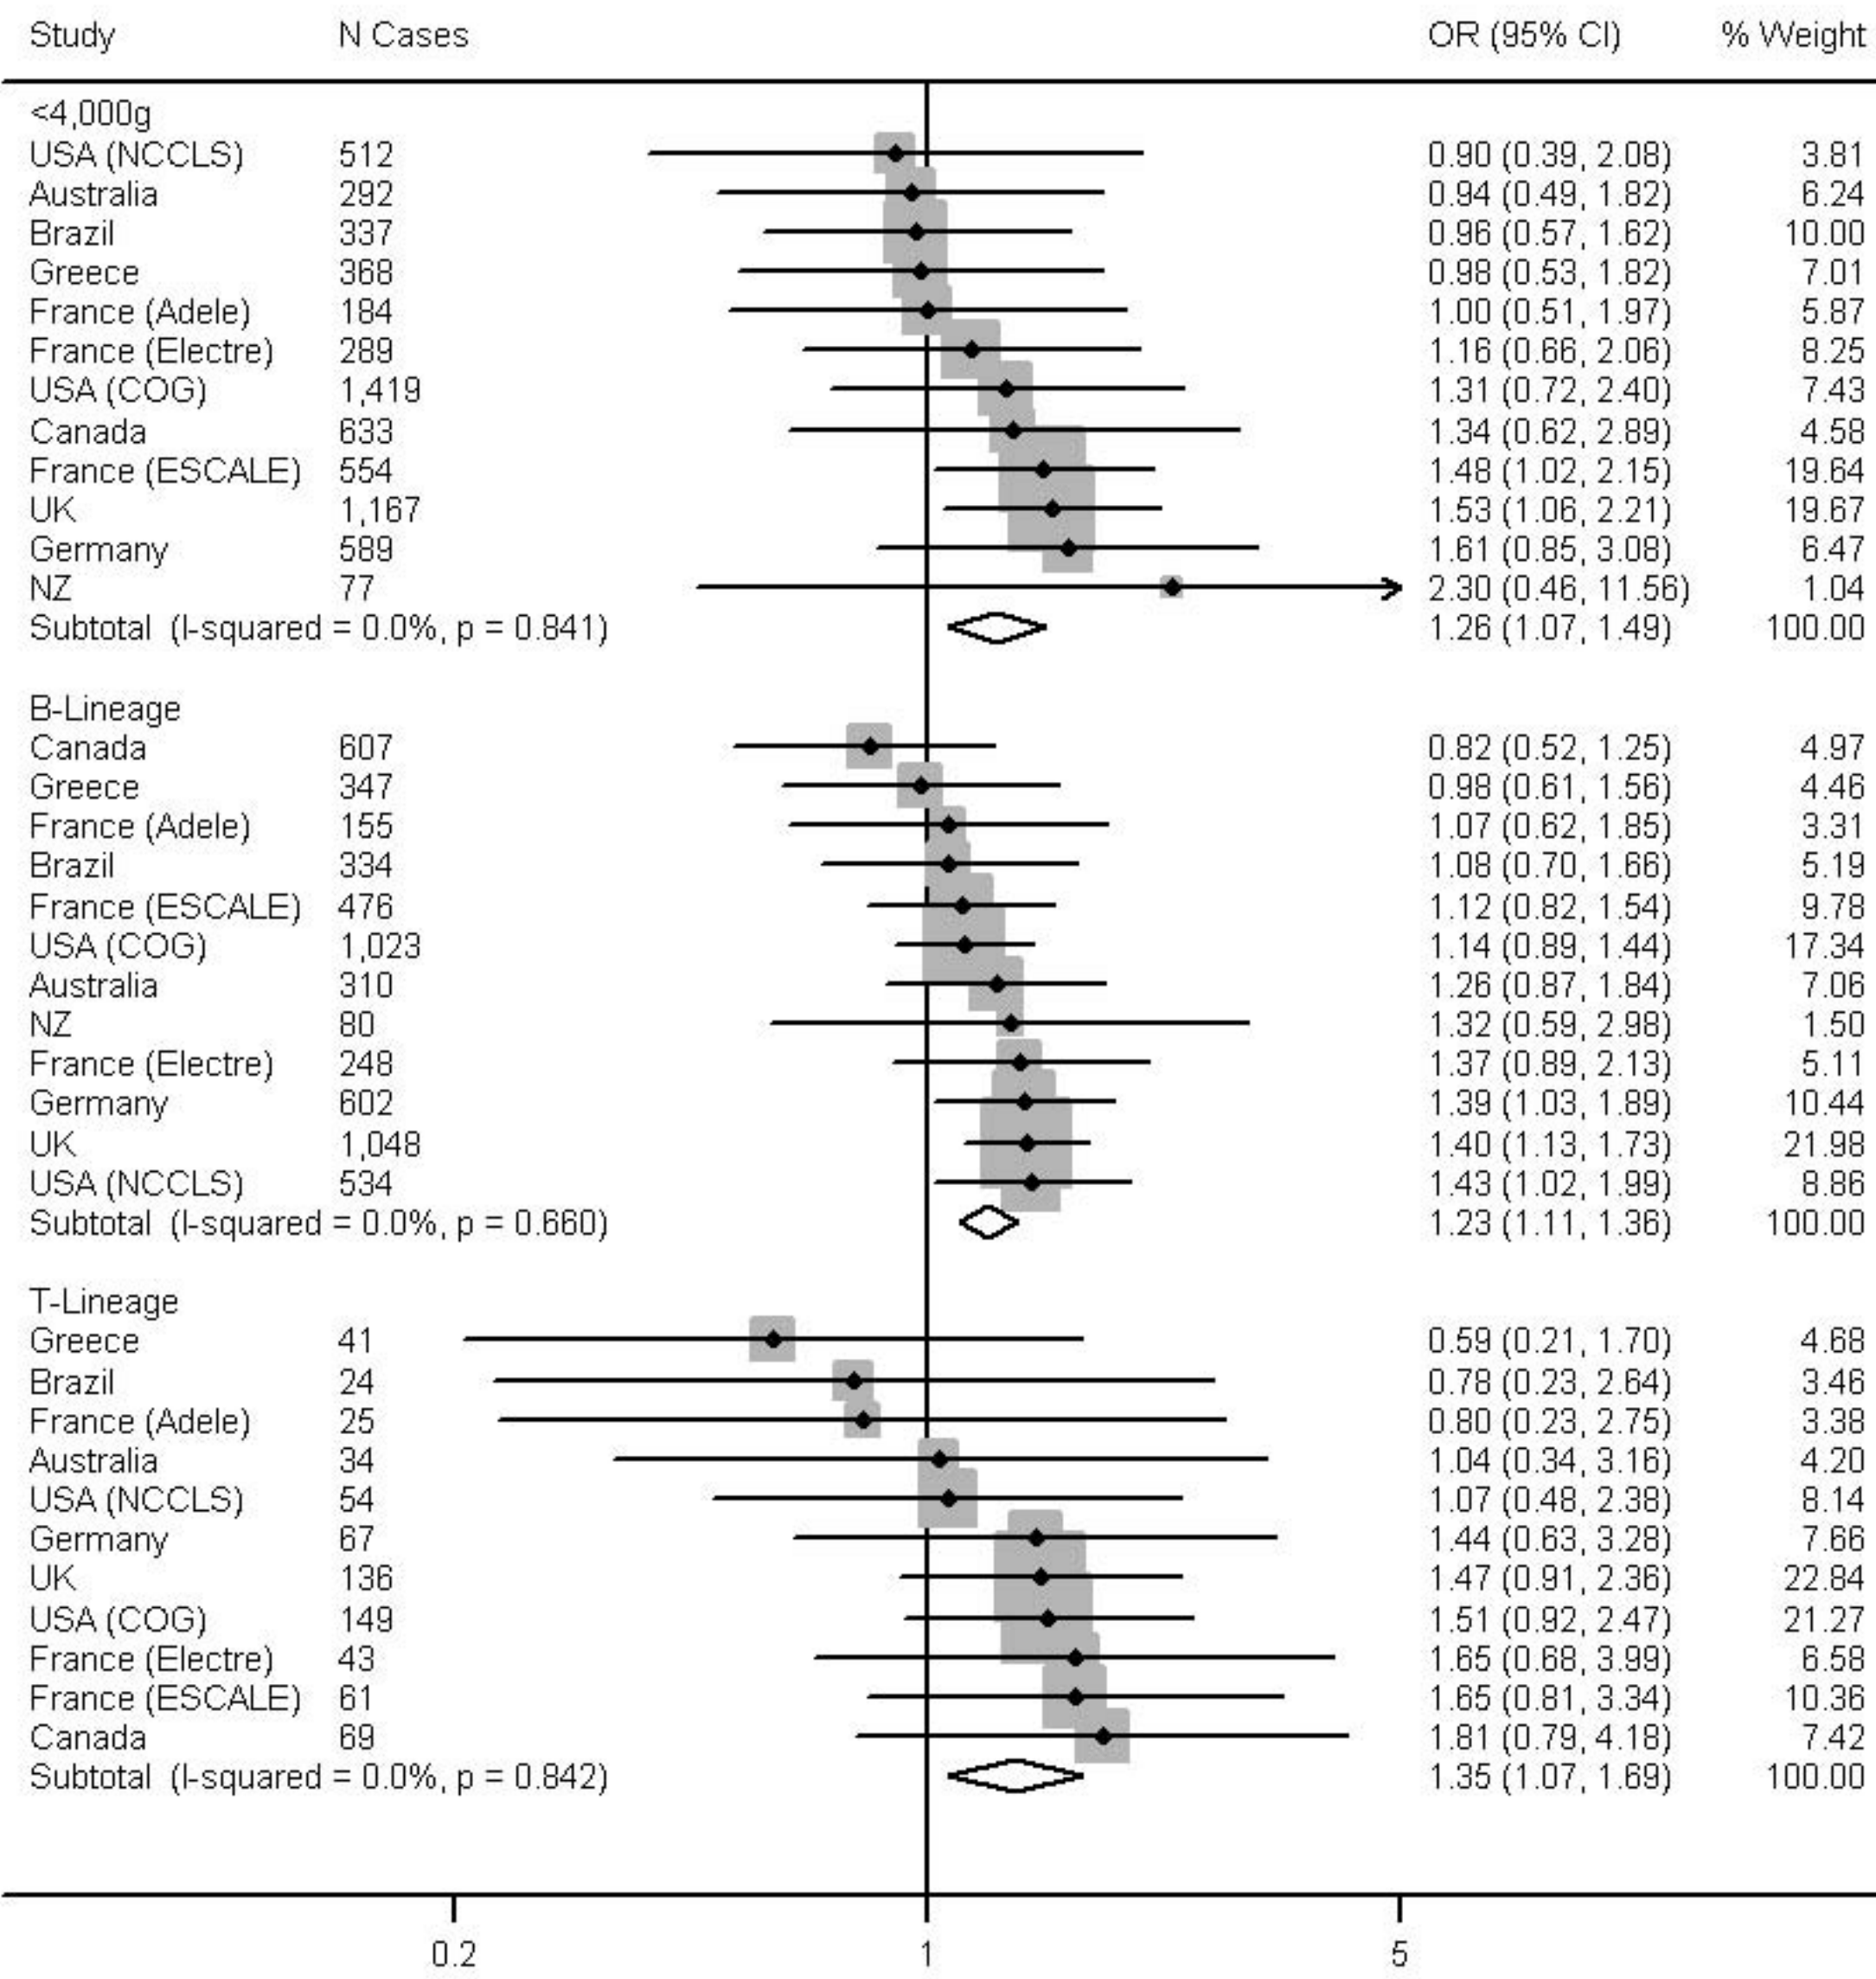

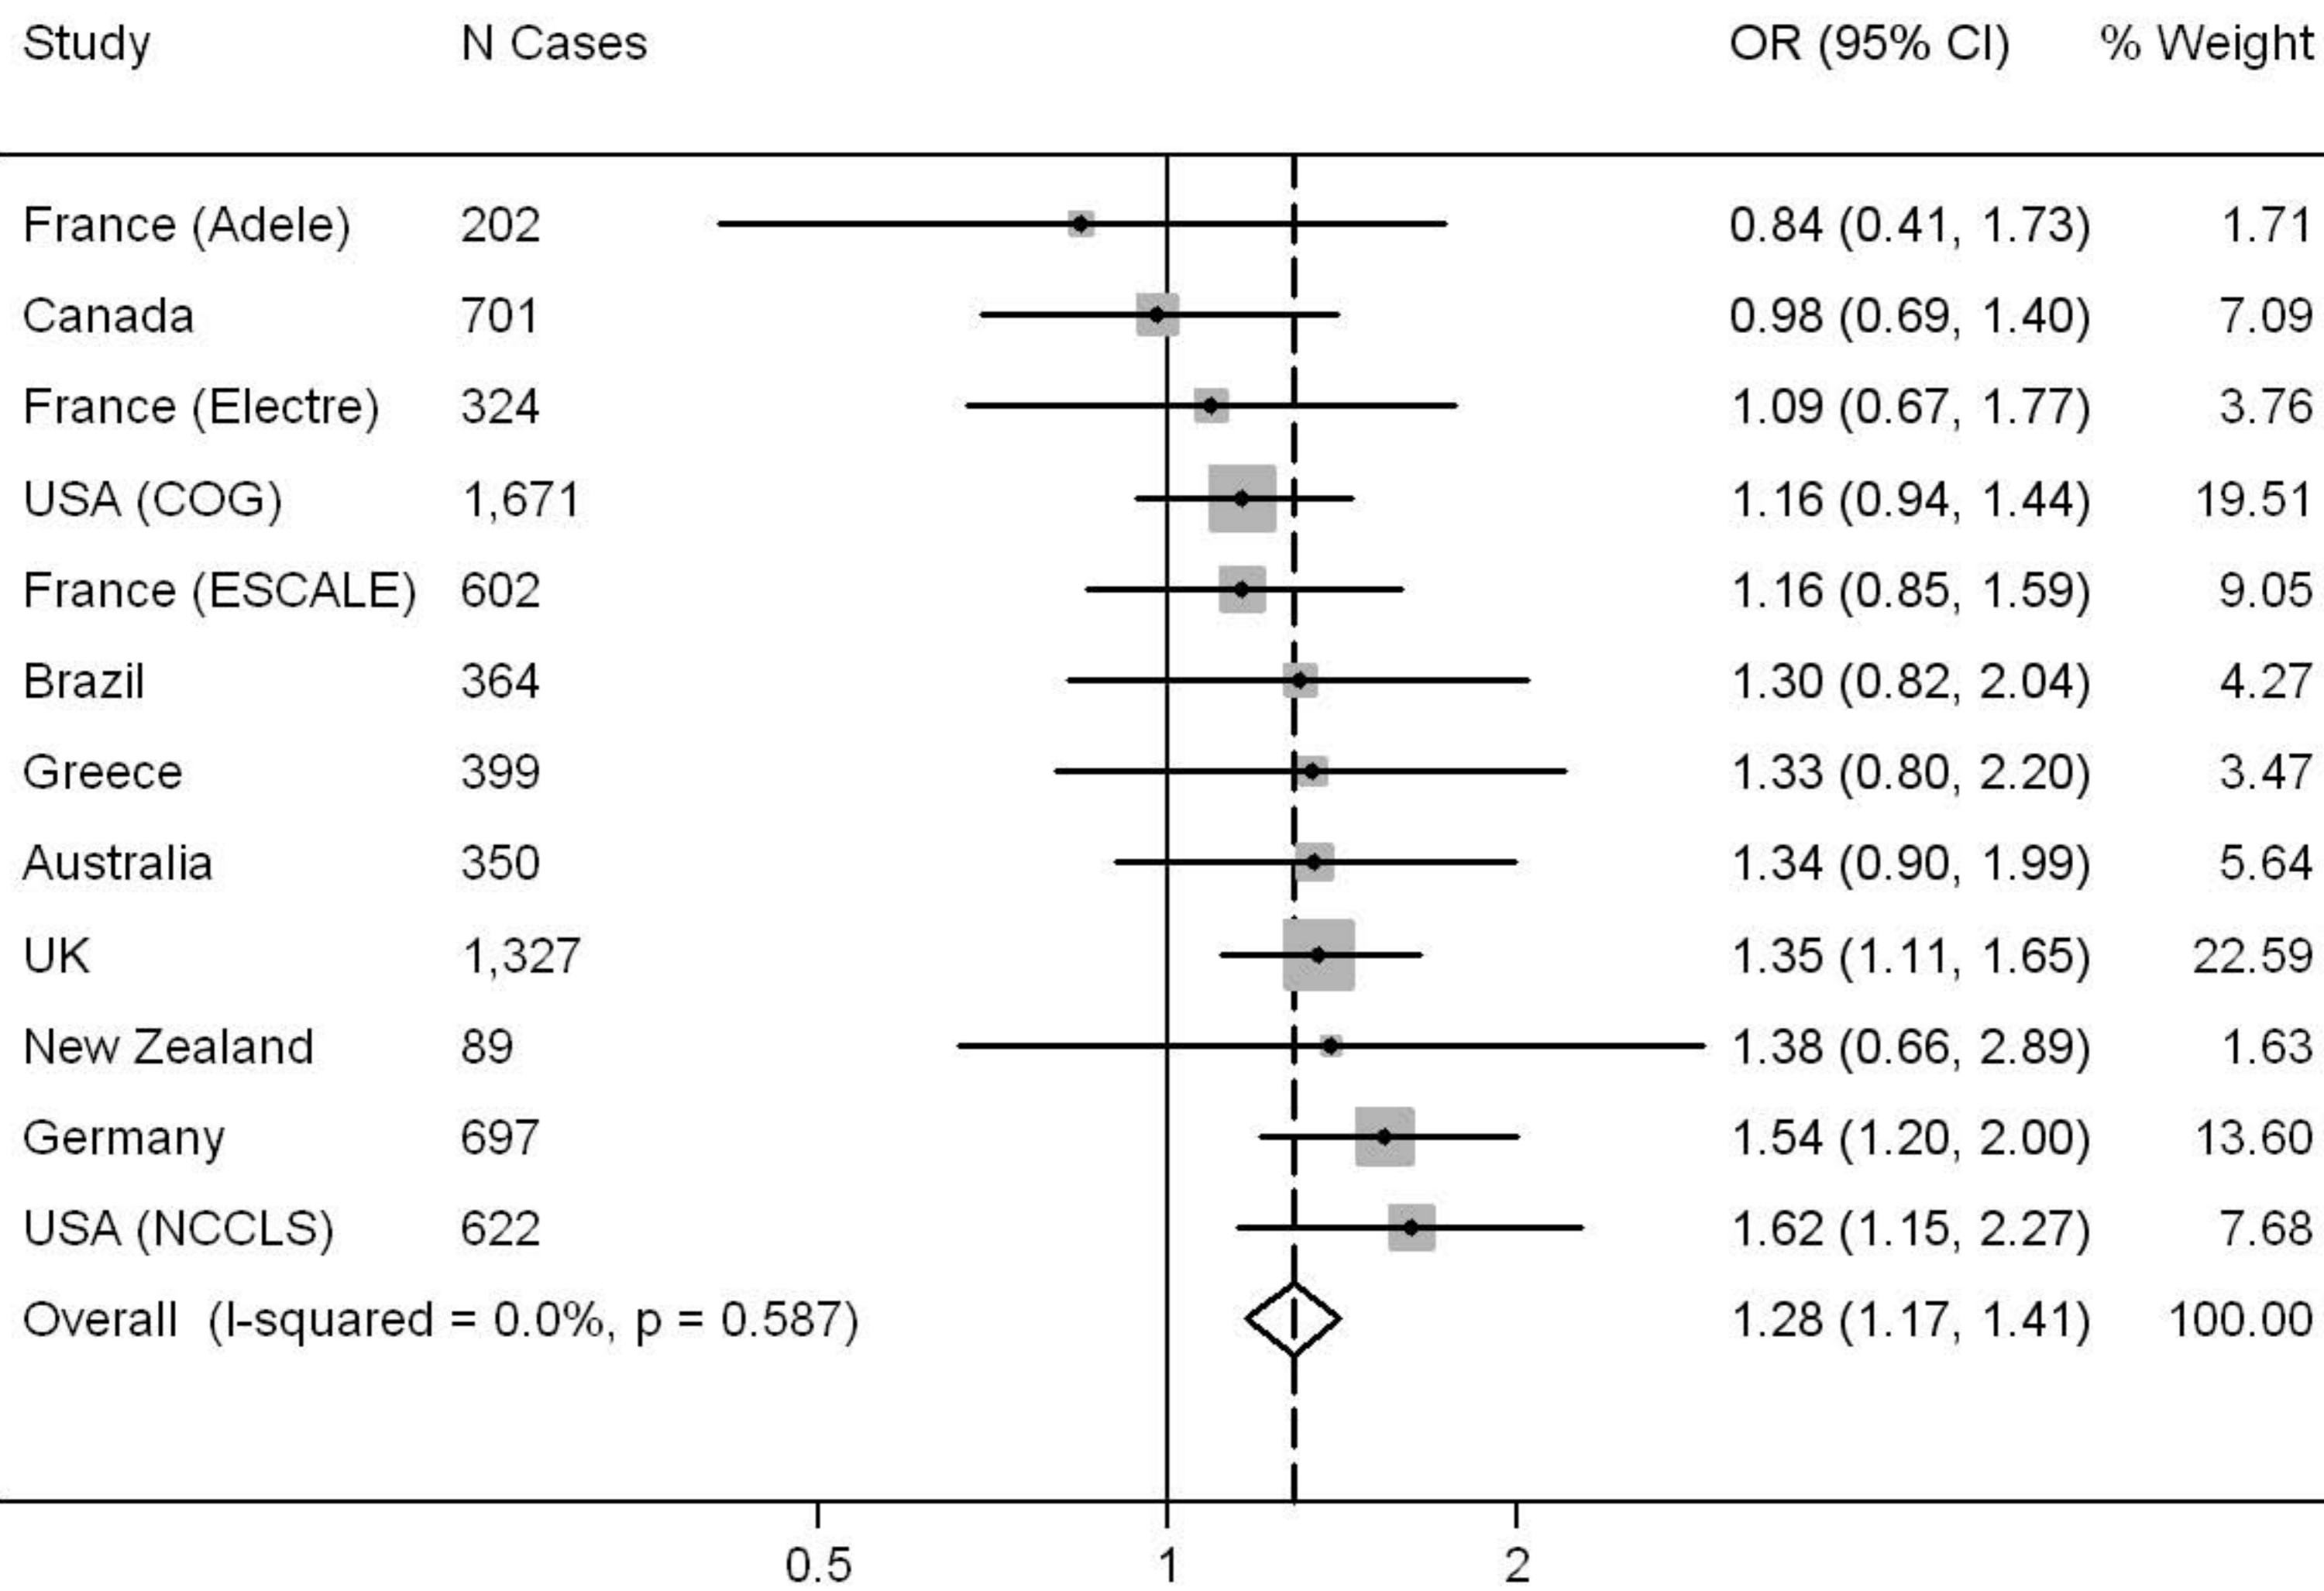

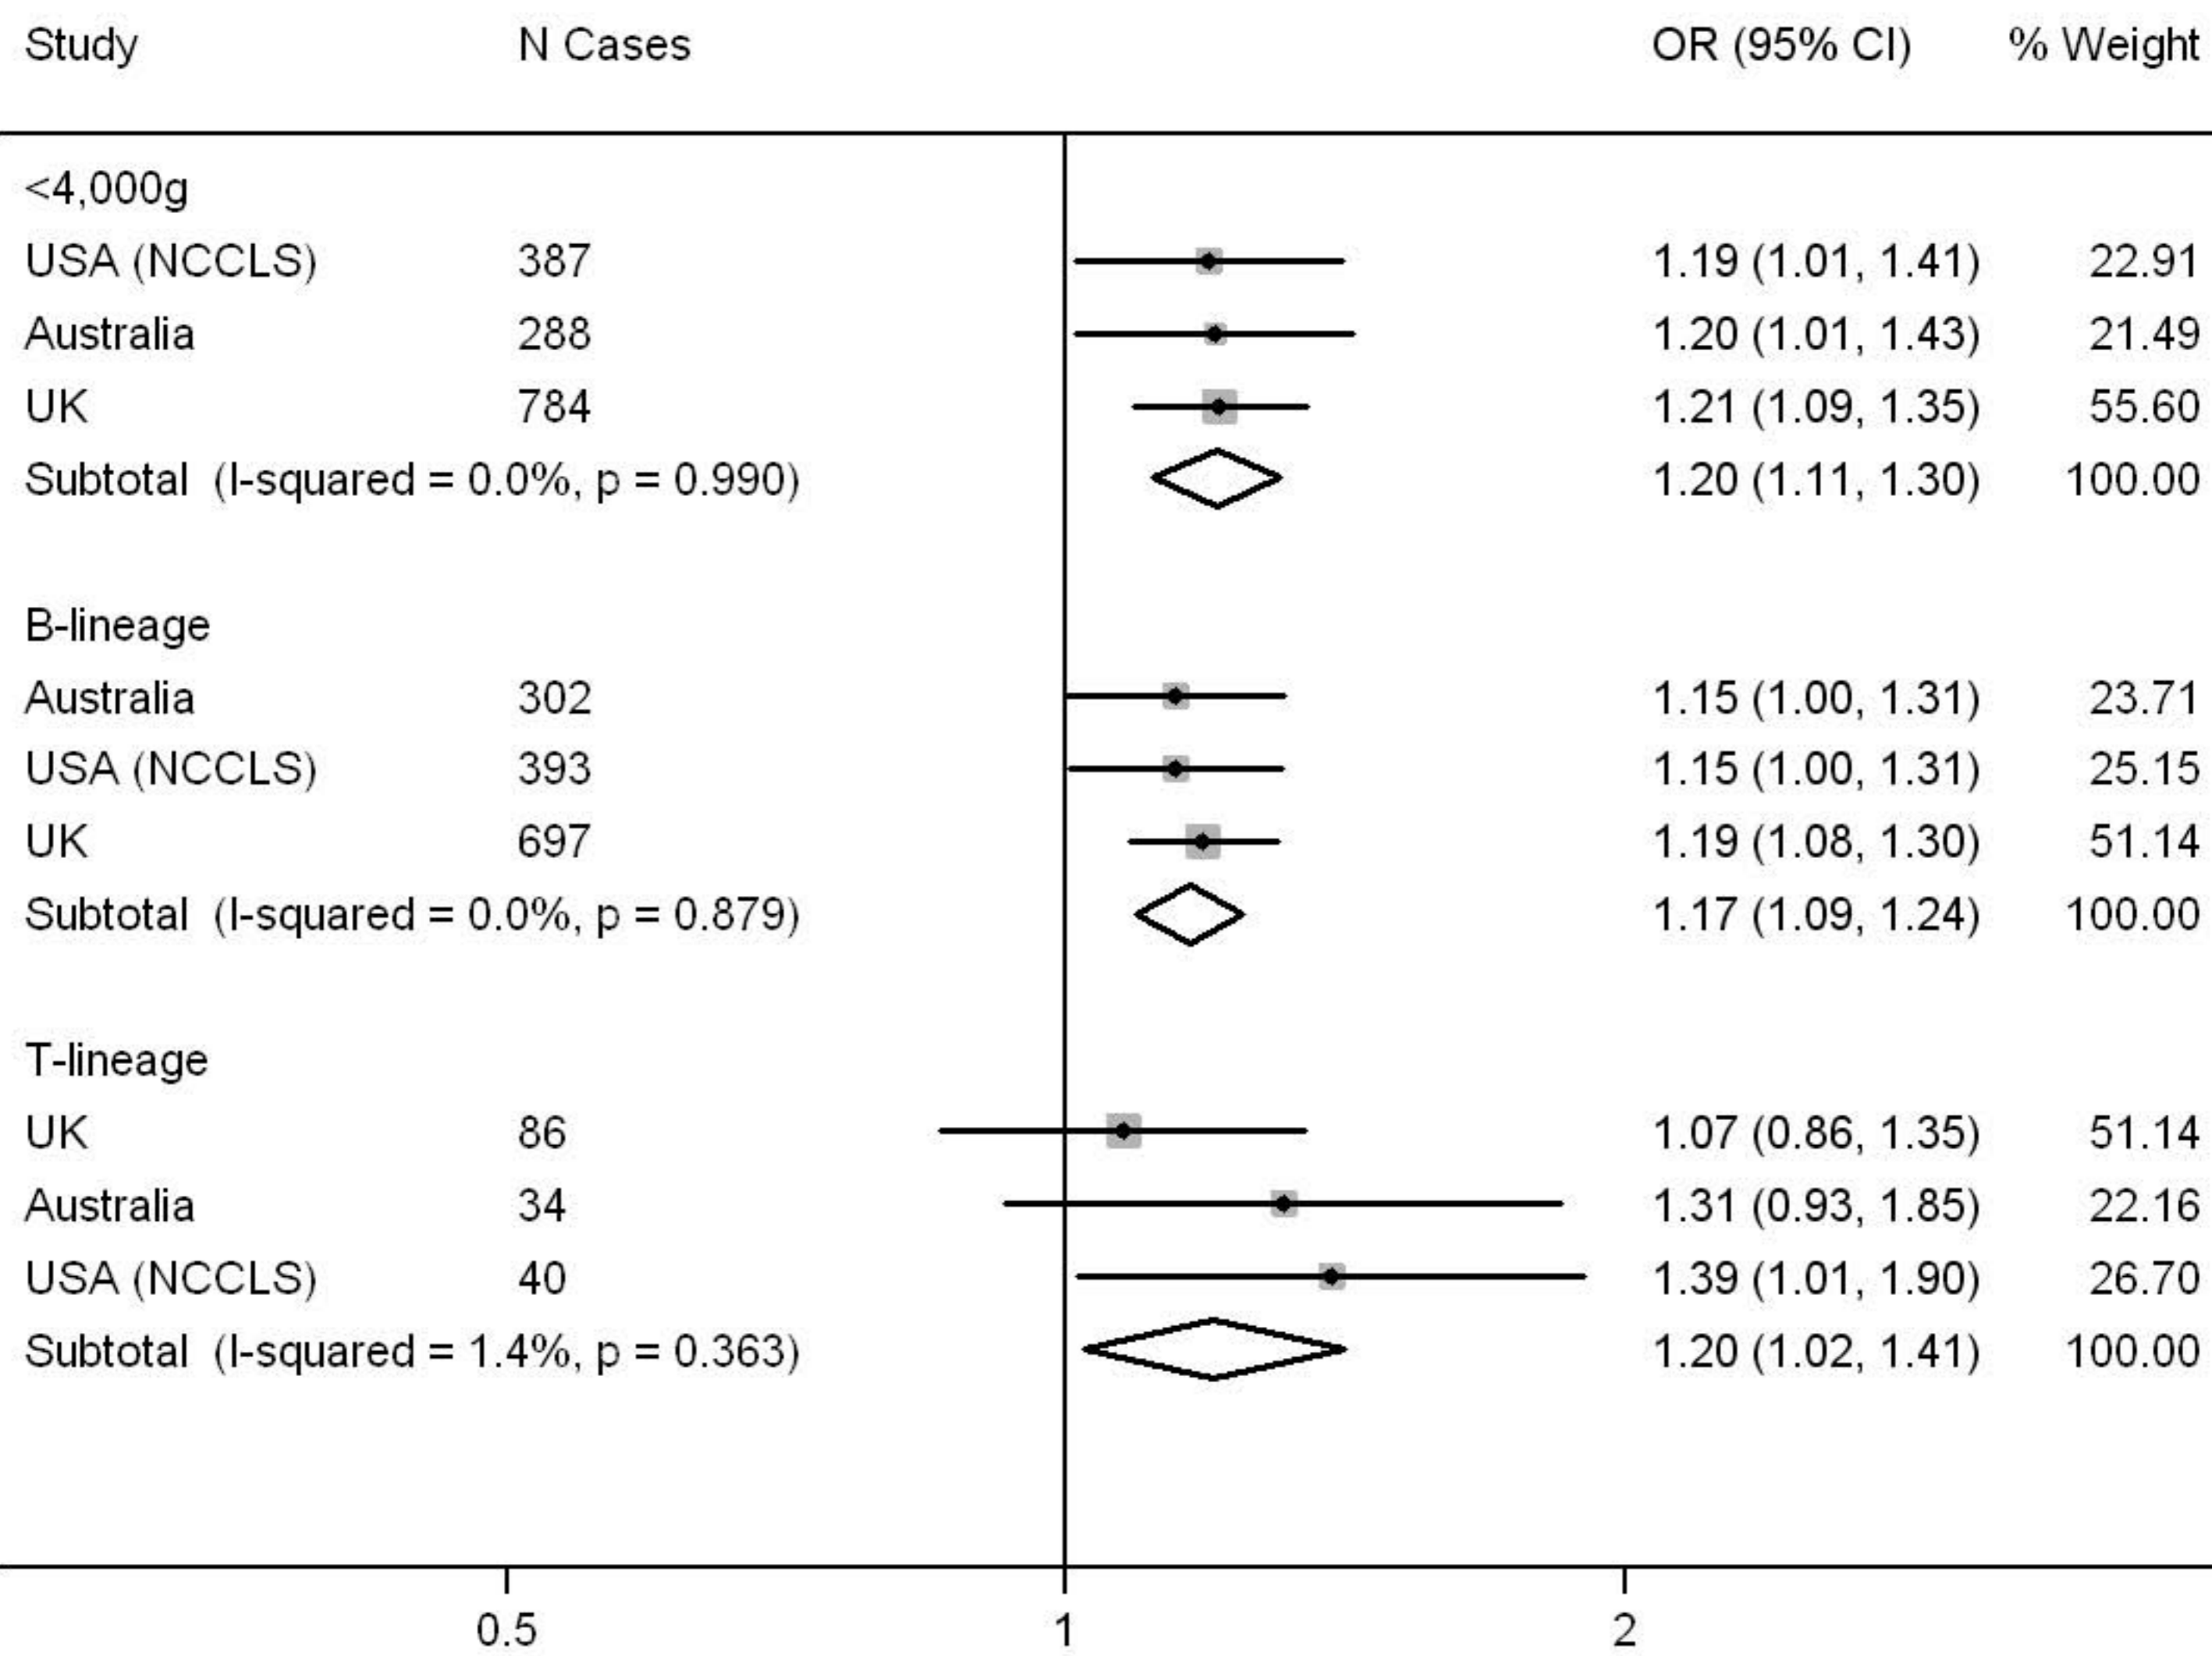

Supplement: NIHMS497577-supplement-Supp_Fig_S1-S3.pdf [file NIHMS497577-supplement-Supp_Fig_S1-S3.pdf]
